# Supplementary material for: Bi4Ti3O12 nanosheets/TiO2 submicron fibers heterostructures: in situ fabrication and high visible light photocatalytic activity
Source: Royal Society of Chemistry journal article supplement (doi:10.1039/c1jm10343a), 2011-01-01
Supplement: c1jm10343a.pdf [file c1jm10343a.pdf]

## Supplementary Information

### **Bi<sub>4</sub>Ti<sub>3</sub>O<sub>12</sub> nanosheets/TiO<sub>2</sub> submicron fibers heterostructures: in situ fabrication and high visible light photocatalytic activity**

Tieping Cao<sup>a,b</sup>, Yuejun Li<sup>a,b</sup>, Changhua Wang<sup>a</sup>, ZhenYi Zhang<sup>a</sup>, Mingyi Zhang<sup>a</sup>,

Changlu Shao<sup>a,\*</sup> and Yichun Liu<sup>a</sup>

<sup>a</sup> Centre for Advanced Optoelectronic Functional Materials Research, Key Laboratory for UV Light-Emitting Materials and Technology of Ministry of Education, Northeast Normal University, Changchun 130024, People's Republic of China

<sup>b</sup> Department of Chemistry, Baicheng Teacher's College, Baicheng, Jilin 137000, China

**Detail derivation process for the relation between the molar ratio of Bi<sub>4</sub>Ti<sub>3</sub>O<sub>12</sub> to TiO<sub>2</sub> and the atomic ratio of Bi to Ti:** If the molar number of Bi<sub>4</sub>Ti<sub>3</sub>O<sub>12</sub> and TiO<sub>2</sub> is a and b, respectively, then the molar ratio of Bi<sub>4</sub>Ti<sub>3</sub>O<sub>12</sub> to TiO<sub>2</sub> (denoted as R) and the atomic ratio of Bi to Ti (denoted as r) can be calculated as following:

$$\begin{cases} \frac{a}{b} = R & (1) \\ \frac{4a}{3a+b} = r & (2) \end{cases}$$

Thus,  $r = \frac{4}{3 + \frac{1}{R}} \Rightarrow R = \frac{r}{4 - 3r}$

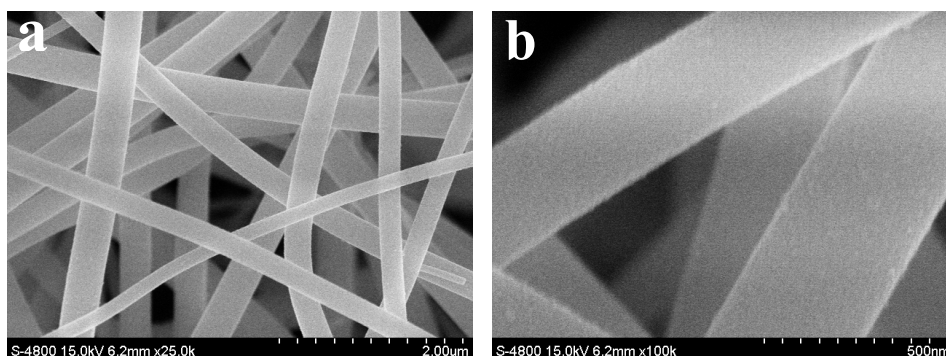

Fig. S1: SEM image of pure TiO<sub>2</sub> nanofibers: (a) low magnification, (b) high magnification.

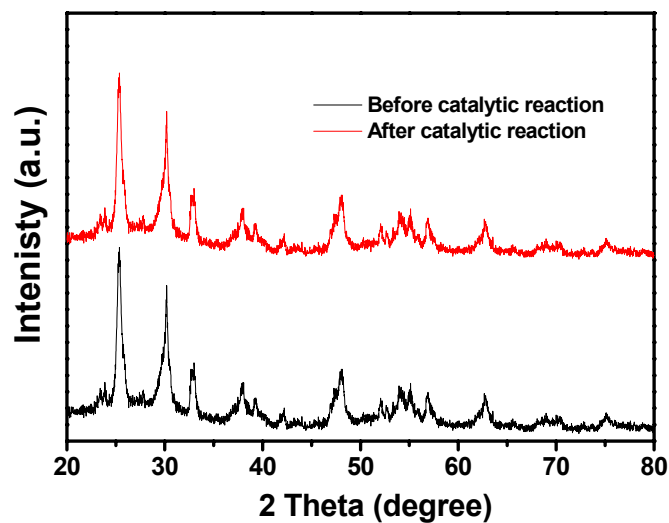

Fig. S2: XRD pattern comparison of sample BT1 before and after photocatalytic reaction.

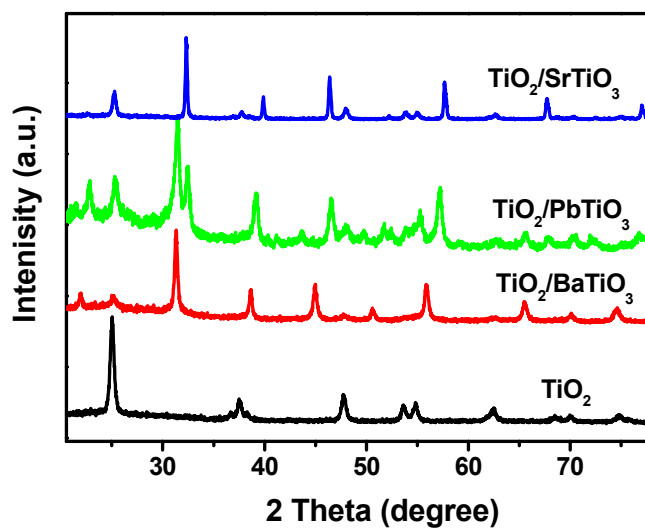

Fig. S3: XRD patterns of different as-synthesized samples.
